# Supplementary material
Source: PubMed Central journal article supplement (PMC2486422)
Supplement: emboj2008110s7.pdf [file emboj2008110s7.pdf]

**Supplementary Table I** Cell count result in *Xist* RNA-FISH in day3 EB

| Genotype                                                   | Strong <i>Xist</i> signal | Weak <i>Xist</i> signal | No <i>Xist</i> signal | Total No. of nuclei counted |
|------------------------------------------------------------|---------------------------|-------------------------|-----------------------|-----------------------------|
| X <sup>Δ</sup> X                                           | 120 (66.3%)               | 21 (11.6%)              | 40 (22.0%)            | 181 (100%)                  |
| XY <i>Eed</i> <sup>-/-</sup>                               | 0 (0%)                    | 0 (0%)                  | 83 (100%)             | 83 (100%)                   |
| X <sup>Δ</sup> Y <i>Eed</i> <sup>-/-</sup> 1 <sup>*1</sup> | 146 (59.8%)               | 23 (9.4%)               | 75 (30.7%)            | 244 (100%)                  |
| X <sup>Δ</sup> Y <i>Eed</i> <sup>-/-</sup> 2 <sup>*2</sup> | 119 (63.6%)               | 16 (8.6%)               | 52 (27.8%)            | 187 (100%)                  |

\*1 X<sup>Δ</sup>Y *Eed*<sup>-/-</sup> cell clone 1

\*2 X<sup>Δ</sup>Y *Eed*<sup>-/-</sup> cell clone 2

**Supplementary Table II** Relative amount of *Xist* RNA to undifferentiated female ES cells

| Genotype                                                                     | Condition        | Relative <i>Xist</i> expression<br>(Mean $\pm$ SD) | p-value <sup>*1</sup> vs. XX <sup>*2</sup> | p-value vs. XY <i>Eed</i> <sup>-/-</sup> <sup>*3</sup> |
|------------------------------------------------------------------------------|------------------|----------------------------------------------------|--------------------------------------------|--------------------------------------------------------|
| XX                                                                           | undifferentiated | 1.0 $\pm$ 0.4                                      | NA <sup>*4</sup>                           | < 0.005                                                |
| XY <i>Eed</i> -TG                                                            | undifferentiated | 1.4 $\pm$ 0.3                                      | not significant <sup>*5</sup>              | < 0.005                                                |
| XY <i>Eed</i> <sup>-/-</sup>                                                 | undifferentiated | 6.5 $\pm$ 1.1                                      | < 0.005                                    | NA                                                     |
| X <sup><math>\Delta</math></sup> Y <i>Eed</i> <sup>-/-</sup> 1 <sup>*6</sup> | undifferentiated | 23.3 $\pm$ 2.6                                     | < 0.0005                                   | < 0.0005                                               |
| X <sup><math>\Delta</math></sup> Y <i>Eed</i> <sup>-/-</sup> 2 <sup>*7</sup> | undifferentiated | 31.2 $\pm$ 11.1                                    | < 0.01                                     | < 0.05                                                 |
| XX                                                                           | EB day 4         | 34.1 $\pm$ 1.1                                     | NA                                         | < 0.005                                                |
| XY <i>Eed</i> <sup>-/-</sup>                                                 | EB day 4         | 9.8 $\pm$ 6.8                                      | < 0.005                                    | NA                                                     |
| X <sup><math>\Delta</math></sup> Y <i>Eed</i> <sup>-/-</sup>                 | EB day 4         | 163.3 $\pm$ 35.6                                   | < 0.005                                    | < 0.005                                                |
| XX                                                                           | EB day 12        | 19.4 $\pm$ 2.3                                     | NA                                         | < 0.005                                                |
| XY <i>Eed</i> <sup>-/-</sup>                                                 | EB day 12        | 7.5 $\pm$ 2.4                                      | < 0.005                                    | NA                                                     |
| X <sup><math>\Delta</math></sup> Y <i>Eed</i> <sup>-/-</sup>                 | EB day 12        | 219.8 $\pm$ 13.8                                   | < 0.00005                                  | < 0.00005                                              |

<sup>\*1</sup> p-values were determined by student's t-test

<sup>\*2</sup> p-values vs. XX cells in the same condition

<sup>\*3</sup> p-values vs. XY *Eed*<sup>-/-</sup> cells in the same condition

<sup>\*4</sup> Not applicable

<sup>\*5</sup> p>0.05

<sup>\*6</sup> X <sup>$\Delta$</sup> Y *Eed*<sup>-/-</sup> cell clone 1

<sup>\*7</sup> X <sup>$\Delta$</sup> Y *Eed*<sup>-/-</sup> cell clone 2

**Supplementary Table III** The number of nuclei showing co-localization of H4K20m1 and *Xist* RNA at the onset of XCI

| Genotype                                   | EB differentiation | H4K20m1    |            |             | No. of <i>Xist</i> -positive nuclei examined |
|--------------------------------------------|--------------------|------------|------------|-------------|----------------------------------------------|
|                                            |                    | ++         | + ~ ±      | -           |                                              |
| X <sup>Δ</sup> X                           | 2 days             | 41 (25.5%) | 76 (47.2%) | 44 (27.3%)  | 161 (100%)                                   |
| X <sup>Δ</sup> Y <i>Eed</i> <sup>-/-</sup> | 2 days             | 1 (0.8%)   | 4 (3.3%)   | 116 (95.9%) | 121 (100%)                                   |
| X <sup>Δ</sup> X                           | 4 days             | 94 (39.7%) | 99 (41.8%) | 44 (18.6%)  | 237 (100%)                                   |
| X <sup>Δ</sup> Y <i>Eed</i> <sup>-/-</sup> | 4 days             | 0 (0.0%)   | 18 (10.7%) | 150 (89.3%) | 168 (100%)                                   |

**Supplementary Table IV** Primers and probes used for real-time PCR

| Amplicon                         | PCR primers                                                              | Reference (Genbank Accession#) <sup>*1</sup>                                   | TaqMan probe                            | Reference (Genbank Accession#) <sup>*1</sup> |
|----------------------------------|--------------------------------------------------------------------------|--------------------------------------------------------------------------------|-----------------------------------------|----------------------------------------------|
| <i>Xist</i><br>(RT-PCR)          | gga gtg aag agt gct gga gag a<br>gct gct ggc agt cct tga                 | L04961.1@9544-9565 (Fw) <sup>*2</sup><br>L04961.1@9615-9598 (RC) <sup>*3</sup> | 5'-FAM- ccc aaa ggg aca aac aa -MGB-3'  | L04961.1@9567-9583 (Fw)                      |
| <i>Tsix(4)</i><br>(RT-PCR, ChIP) | ctg tga att att tgt cag cgt gaa tca<br>aga gat cag aca ccc tgg gta tta g | AJ421479.1@105507-105533 (Fw)<br>AJ421479.1@105584-105560 (RC)                 | 5'-FAM- acg aga caa caa tat cc -MGB-3'  | AJ421479.1@105534-105550 (Fw)                |
| <i>Xist-P</i><br>(ChIP)          | ttt gtg gcc act cct ctt ctg<br>cgt tgc acg cct tta act gat c             | AJ421479.1@106232-106252 (Fw)<br>AJ421479.1@106297-106276 (RC)                 | 5'-FAM- tct ceg cct tca geg cc -MGB-3'  | AJ421479.1@106256-106272 (Fw)                |
| <i>Xist-GB1</i><br>(ChIP)        | tgc ata tgg acc cct ggc<br>gcc att tta tag act tct gag cag c             | L04961.1@1178-1195 (Fw)<br>L04961.1@1242-1218 (RC)                             | 5'-VIC- ccc gtg gct tta ag -MGB-3'      | L04961.1@1203-1216 (Fw)                      |
| <i>Xist-GB2</i><br>(ChIP)        | cag cgg gat ggc aag atg<br>ggg tcc tgg aga tca aag tga gat               | L04961.1@9304-9287 (RC)<br>L04961.1@9224-9247 (Fw)                             | 5'-VIC- ttg ctg cca agc ctg -MGB-3'     | L04961.1@9265-9251 (RC)                      |
| <i>5'-Tsix</i><br>(ChIP)         | gca gac tta gtt act cgt tct tgg t<br>ggg cac aga ttc aga aaa gtg gaa     | X99946.1@80060-80036 (Fw)<br>X99946.1@79988-80011 (RC)                         | 5'-FAM- aca cgc tac cag taa ttt -MGB-3' | X99946.1@80029-80012 (RC)                    |
| <i>Sox9-P</i><br>(ChIP)          | agc cca gct ccg ctt tg<br>tgg cgt tta cag caa tgg aa                     | NT_165773.2@24184076-24184092 (Fw)<br>NT_165773.2@24184130-24184111 (RC)       | 5'-VIC- cga gca gct gtt gca -MGB-3'     | NT_165773.2@24184094-24184108 (Fw)           |
| <i>Gata6-P</i><br>(ChIP)         | ccc aga gcg ttg aat tcc a<br>gac cct gtt tgg gga tgc t                   | NT_039674.7@8051865-8051883 (Fw)<br>NT_039674.7@8051919-8051901 (RC)           | 5'-FAM- agg acc cca cga cct -MGB-3'     | NT_039674.7@8051885-8051899 (Fw)             |

<sup>\*1</sup> The reference is shown as a nucleotide position in the indicated Genbank sequence

<sup>\*2</sup> Fw: Forward orientation to the reference sequence

<sup>\*3</sup> RC: Reverse complement to the reference sequence
