# Supplementary material
Source: PubMed Central journal article supplement (PMC2486422)

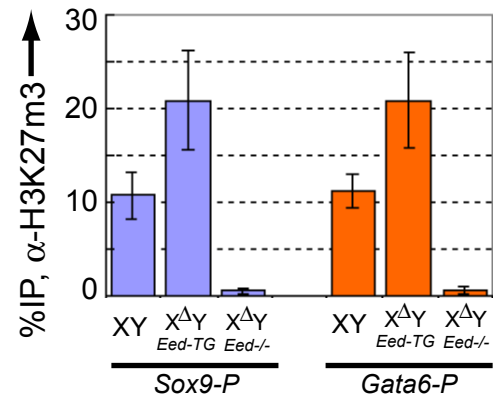

Shibata *et al*, Supplementary Figure S1

Supplement: emboj2008110s1.pdf [file emboj2008110s1.pdf]

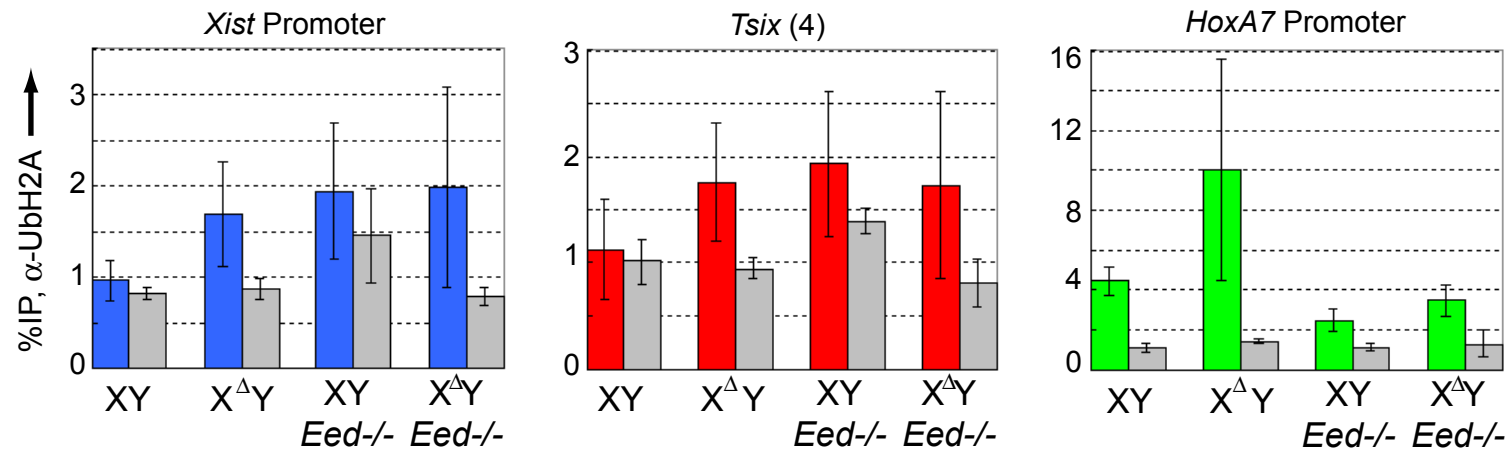

Shibata *et al*, Supplementary Figure S5

Supplement: emboj2008110s5.pdf [file emboj2008110s5.pdf]
